# Supplementary material for: A middle Cambrian macroscopic tardigrade ancestor
Source: Research Square preprint supplement (doi:10.21203/rs.3.rs-8911114/v1), 2026-02-23
Supplement: Supplementary file 1 [file a41ac543858b0a4fb69f5246.docx]

We used a phylogenetic dataset modified from Yang et al. (2016) (Yang *et al.* 2016). Tardigrades from all heterotardigrade families, apochelan family, and eutardigrade superfamilies are included to reflect the wide morphological diversity ofthe phylum. We also developed a comprehensive approach for treating the uncertainty regarding the identity of the protocerebral appendage pair of tardigrades as detailed below.

Tardigrade Hox gene expression patterns suggests that the body consists of five segments, with the four anterior-most segments being serial homologues of the four anterior-most segments of euarthropods and onychophorans (Smith *et al.* 2016) . If the protocrebral body segment of euarthropods and onychophorans have appendages (the labrum and primary antenna, respectively), what is the corresponding appendage pair of the tardigrade body plan?

It has been proposed that the protocerebral appendages of tardigrades could have been modified and internalized to become the stylet apparatus (e.g. (Yang *et al.* 2015; Ortega-Hernández, Janssen and Budd 2017)). This hypothesis is derived from the fact that both stylets and terminal claws are produced by glands (Møbjerg *et al.* 2018), and the muscles attached to both the stylets and claws have similar morphology (Halberg *et al.* 2009) . However, the similarities in muscular morphology could also be due to functional requirements and a result of convergent evolution. There are also no developmental studies that support the internalization of these appendages similar to what was observed in the jaw development of onychophorans (Ou, Shu and Mayer 2012). Claw and stylet glands appear to have different molecular mechanisms for molting since genes that are shown to be expressed in claw glands during molting are not expressed in stylet glands (Yamakawa and Hejnol 2024). Overall, these arguments question whether the stylet apparatus of tardigrades truly correspond to protocerebral appendages.

Another option comes from considering the anterior organization of marine heterotardigrades, as they embody most of the morphological disparity of the phylum, as exemplified by the different shapes and forms of their cuticular extensions (Fontoura *et al.* 2017). Some heterotardigrade genera (e.g., *Actinarctus*, *Neoarctus*) have cephalic sensorial “appendages” (i.e., cirri A and primary clava) that have limb-like morphology (De Zio Grimaldi, Gallo and Lucia 1992; Grollmann, Jørgensen and Møbjerg 2023). Indeed, the resemblance of these structures to a modified limb with their sense organs has been noted (Møbjerg *et al.* 2018) . Thus, the protocerebral appendages of tardigrades could be expressed as the antero-lateral sensorial structures of heterotardigrades. These features are not easily distinguishable in eutardigrades since they have been heavily modified to become sensory fields (Gross, Epple and Mayer 2021; Kihm *et al.* 2023b). Additionally, genes that are known to be functionally involved in patterning sensory structures are shown to be expressed on the lateral side of the head of the eutardigrade *Hypsibius* despite lacking observable cephalic appendages (Mapalo *et al.* 2024).

Despite all the morphological and developmental evidence that can support the previous hypothesis, another plausible explanation is that the protocerebral segment of the tardigrade body has completely lost its corresponding appendages. Appendage loss in panarthropods is well documented in the case of the intercalary segments of hexapods and myriapods (Pechmann *et al.* 2015).

Given all these possible scenarios, we performed different phylogenetic reconstructions that accommodate the following three hypotheses:

1. “Stylet hypothesis” – the ancestral protocerebral appendages of tardigrades corresponds to the stylet apparatus.
2. “Sensorial hypothesis” – the ancestral protocerebral appendages of tardigrades corresponds to the lateral cephalic appendages (i.e., cirri A and primary clava) of heterotardigrades, and sensorial field of eutardigrades.
3. “Lost hypothesis” – the ancestral protocerebral appendage pair of tardigrades has been completely lost in modern species.

We produced three different character matrices using the characters below with different scoring in certain characters to reflect the specific assumptions of the individual hypotheses.

## General organization

1. Paired appendages

(0) absent

(1) present

## Head region

1. Anterior region covered by sclerites

(0) absent

(1) present

Numerous lobopodians have been considered to have cephalic sclerites (see (Ma *et al.* 2014b) trans. ser. 37), but in some cases this interpretation requires revision or confirmation through new material. Following recent data presented by Liu and Dunlop (2014) (Liu and Dunlop 2014), this character is scored absent in *Hallucigenia fortis* (*contra* (Hou and Bergström 1995) , *Onychodictyon ferox* (Ou, Shu and Mayer 2012)and *Cardiodictyon* (Hou and Bergström 1995). An uncertain scoring is used where the anterior region is ambiguously preserved, such as in *H. hongmeia* (Steiner *et al.* 2012). This character is scored as present in for the sclerotized structures observed in the head region of *Luolishania* (Ma, Hou and Bergström 2009) and the Emu Bay Shale Collins’ monster ((García-Bellido *et al.* 2013), fig 1c), as the morphological similarity with *Collinsium* strengthens the likelihood that the cephalic sclerites represent a legitimate feature in the former taxon (*contra* (Smith and Ortega-Hernández 2014). *Collinsium* bears a pair of discrete subrectangular sclerites on the anterior region. Taxa with an incomplete anterior region (e.g., *Acinocricus*, *Hadranax, Orstenotubulus*) are coded as uncertain. This character is coded as present for the Burgess Shale Collins’ monster after its formal description as *Collinsovermis monstruosus* mentioned the presence of a teardrop-shaped sclerite on the head region (Caron and Aria 2020). Several heterotardigrades (e.g., *Stygarctus, Renaudarctus,* *Echiniscus*) are characterized of having thick dorsal plates (Degma and Guidetti 2018; Møbjerg *et al.* 2018) and are scored as having sclerotized plates.

1. Head shield formed by fused cephalic segments

(0) absent

(1) present

(–) inapplicable: head sclerites (Character 2) absent

This character is scored as absent for fuxianhuiids, because the cephalic shield is not derived from fused segments (Chen *et al.* 1995; Waloszek *et al.* 2005; Bergström *et al.* 2008; Yang *et al.* 2013), and in radiodontans, because the carapace-like structure on the head seems not to cover multiple cephalic segments (e.g. (Daley *et al.* 2009; Daley and Edgecombe 2014)). This character is scored as absent in the Emu Bay Shale Collins’ monster based on the close morphological similarities with the anterior organization in *Luolishania* (Ma *et al.* 2012)and *Collinsium* (Yang *et al.* 2015). This character is scored as absent in tardigrades since Hox gene expression suggest that their head region is composed of only one segment (Smith *et al.* 2016).

1. Isolated dorsal sclerite associated with eyestalks

(0) absent

(1) present

(–) inapplicable: head sclerites (Character 2)

This character is scored as present in radiodontans because the dorsal carapace-like structure covering their heads is associated with eyestalks, regardless of its shape or size(Daley *et al.* 2009; Daley and Edgecombe 2014). Anterior sclerites are widespread among Paleozoic euarthropods including fuxianhuiids (Budd 2008; Yang *et al.* 2013), and artiopodans (Edgecombe and Ramsköld 1999; Ortega-Hernández, Legg and Braddy 2013). Recent palaeoneurological data support the homology of the dorsal carapace-like plate in Radiodonta with the anterior sclerite of upper-stem and crown-group Euarthropoda (Ortega-Hernández 2015). This character is scored as absent in *Collinsium* (Yang *et al.* 2015)*,* *Collinsovermis* (Caron and Aria 2020)*,* and *Luolishania* (Ma, Hou and Bergström 2009)given that the isolated sclerites on the head region are not associated with stalked lateral eyes; an uncertain score is coded for the Emu Bay Shale Collins’ monster as it is not possible to discern the anterior organization of the only available specimen, despite the presence of a well-defined isolated sclerite (García-Bellido *et al.* 2013). This character is scored as absent in tardigrades since they do not possess stalked eyes (Møbjerg *et al.* 2018).

1. Shape of dorsal isolated sclerite

*(0) semicircular/rounded*

*(1) well-developed and elongate*

*(–) inapplicable: isolated dorsal sclerite (Character 4) absent*

See (Van Roy, Daley and Briggs 2015), char 59.

1. Extent of coverage of dorsal isolated sclerite on head

*(0) broad attachment to cephalic region*

*(1) narrow attachment with anterior edge of cephalic region*

*(–) inapplicable: isolated dorsal sclerite (Character 4) absent*

The dorsal isolated sclerite is broadly attached in Radiodonta (Daley *et al.* 2009; Daley and Bergström 2012; Cong *et al.* 2014; Daley and Edgecombe 2014; Van Roy, Daley and Briggs 2015), whereas the euarthropod anterior sclerite is only narrowly attached to the anterior end of the body in upper-stem and crown group euarthropods (Edgecombe and Ramsköld 1999; Budd 2008; Yang *et al.* 2013; Ortega-Hernández 2015).

1. Isolated lateral sclerites, forming tri-partite carapace

*(0) absent*

*(1) present*

*(–) inapplicable: isolated dorsal sclerite (Character 4) absent; cephalic shield (Character 3) present*

This character refers to the lateral elements that typify the anterior scleritome of hurdiid radiodontans (Daley et al. 2009; Daley and Bergström 2012; Van Roy, Daley and Briggs 2015).

## Cephalic/anterior appendages

1. Nature of post-ocular (post-protocerebral) body appendages

(0) lobopodous

(1) arthropodized (sclerotized; arthrodial membranes present)

(–) inapplicable: paired appendages (Character 1) absent

*Schinderhannes* (Kühl, Briggs and Rust 2009)is coded as having lobopodous post-protocerebral appendages based on the presence of a pair of enlarged lateral body flaps resembling those of the recently described radiodontan *Lyrarapax* (Cong *et al.* 2014). Although Liu et al (2011) (Liu *et al.* 2011) described the appendages of the lobopodian *Diania* as having an arthropodized organization, a recent revision of this taxon by (Ma *et al.* 2014b) concluded that the podomere-like structures on the legs are the result of taphonomic artifacts during burial; *Diania* is thus scored as having lobopodous appendages.

1. Protocerebral limb pair with arthrodial membranes

(0) absent

(1) present

(–) inapplicable: paired appendages (Character 1) absent

This character distinguishes the nature of the first pair of appendages as arthropodized or not. Radiodontans are scored as present due to their arthropodized ‘great appendages’ (Daley and Edgecombe 2014). Upper stem-group and crown-group euarthropods due to the presence of non-arthropodized hypostome (Edgecombe and Ramsköld 1999; Yang *et al.* 2013). For the “lost hypothesis” character matrix, tardigrades are scored as inapplicable since this scenario assumes that the ancestral protocerebral appendage pair of tardigrades has been lost.

1. Protocerebral appendage pair fused

(0) not fused

(1) fused

(–) inapplicable: paired appendages (Character 1) absent,

Modified from character 16 in Ma *et al.* (Ma *et al.* 2014b) to reflect the posited homology between the anterior appendages of lobopodians and the euarthropod labrum (Eriksson and Budd 2000; Budd 2002): specifically, the euarthropod labrum is coded as a fused pair of appendages (Scholtz and Edgecombe 2006; Liu, Maas and Waloszek 2009, 2010; Posnien, Bashasab and Bucher 2009). *Megadictyon* (Liu *et al.* 2007)*, Kerygmachela* (Park *et al.* 2018), *Siberion* (Dzik 2011),and *Pambdelurion* (Budd 1997) are coded as having unfused protocerebral appendages as we do not see indication that the bases of these limbs are in contact with each other unlike in Radiodonta (Daley and Edgecombe 2014). *Jianshanopodia* is scored as uncertain as the preservation does not allow resolving this aspect of the morphology (Liu *et al.* 2006; Vannier *et al.* 2014). This character is scored as uncertain in *Hurdia* (Daley *et al.* 2009) and *Aegirocassis* (Van Roy, Daley and Briggs 2015) as the well-developed dorsal cephalic plate does not allow to directly observe the proximal potions of the frontal appendages. For the “lost hypothesis” character matrix, tardigrades are scored as inapplicable since this scenario assumes that the ancestral protocerebral appendage pair of tardigrades has been lost.

1. Nature of protocerebral appendage fusion

(0) basal only, with separate distal elements

(1) fused into a reduced labrum

(–) inapplicable: protocerebral appendages (Character 11) not fused

In radiodontans, appendage fusion is restricted to the proximal component of the frontal appendages (Daley *et al.* 2009; Daley and Edgecombe 2014). Per character 10 above, the euarthropod labrum is coded as a set of fully fused appendages. For the “lost hypothesis” character matrix, tardigrades are scored as inapplicable since this scenario assumes that the ancestral protocerebral appendage pair of tardigrades has been lost.

1. Spines along the protocerebral appendage (i.e., not the terminal part)

(0) absent

(1) present

(–) inapplicable: paired appendages (Character 1) absent

*This character* distinguishes the presence of spines along the appendage compared to being at the terminal end of the appendage*. This distinction* is important for the “sensorial hypothesis” which assumes that heterotardigrades have reduced protocerebral appendage and their cephalic sensory organs (i.e., primary clava and cirri A) correspond to the terminal spines (see introductory statements). *Neostygarctus* *oceanopolis* is scored present only in the “sensorial hypothesis” (Kristensen *et al.* 2015). For the “lost hypothesis” character matrix, tardigrades are scored as inapplicable since this scenario assumes that the ancestral protocerebral appendage pair of tardigrades has been lost.

1. Number of spine/spinule series on protocerebral frontal appendage

*(0) one series (e.g. Aysheaia, Kerygmachela, Opabinia) (Whittington 1978; Budd 1993, 1996, 1998)*

*(1) two series (e.g., Anomalocaris canadensis, Onychodictyon ferox, Schinderhannes bartelsi, Neostygarctus oceanopolis) (Daley and Budd 2010; Ou, Shu and Mayer 2012; Daley and Edgecombe 2014; Kristensen et al. 2015)*

*(–) inapplicable: spines on the protocerebral appendages (Character 12) absent*

Neostygarctus oceanopolis is scored present only in the “sensorial hypothesis” (Kristensen *et al.* 2015). For the “lost hypothesis” character matrix, tardigrades are scored as inapplicable since this scenario assumes that the ancestral protocerebral appendage pair of tardigrades has been lost.

1. Coplanar spine/spinule series in protocerebral frontal appendages

(0) no

(1) yes

(–) inapplicable: spines, if present, in single series (Character 13)

This character distinguishes the coplanar spinules found in *Onychodictyon ferox* (Ou, Shu and Mayer 2012), in which the spines attach at opposite sides of the protocerebral first appendage, from those of *Anomalocaris canadensis* (Daley *et al.* 2009; Daley and Budd 2010; Daley and Edgecombe 2014) and *Schinderhannes bartelsi* (Kühl, Briggs and Rust 2009). *Neostygarctus oceanopolis* is scored present only in the “sensorial hypothesis” (Kristensen *et al.* 2015). For the “lost hypothesis” character matrix, tardigrades are scored as inapplicable since this scenario assumes that the ancestral protocerebral appendage pair of tardigrades has been lost.

1. Multifurcate terminal spines in protocerebral appendage

(0) absent

(1) present

(–) inapplicable: paired appendages (Character 1) absent

This character describes the multifurcate termination observed in the protocerebral appendages of dinocaridids (Budd 1996; Daley *et al.* 2009; Daley and Budd 2010; Budd and Daley 2012; Daley and Edgecombe 2014) and certain lobopodians – such as *Aysheaia* (Whittington 1978)*, Megadictyon* (Liu *et al.* 2007) and *Kerygmachela*  (Budd 1993, 1998)– but absent in *Onychodictyon* *ferox* (Ou, Shu and Mayer 2012). In the “sensorial hypothesis”, the primary clava and cirri A found in heterotardigrades are assumed to correspond to the terminal spines found in certain lobopodians (see introductory statements). For the “lost hypothesis” character matrix, tardigrades are scored as inapplicable since this scenario assumes that the ancestral protocerebral appendage pair of tardigrades has been lost.

1. Nature of post-ocular lobopodous inner branch

(0) cylindrical/subconical appendage

(1) laterally expanded swimming flap

(–) inapplicable: post-ocular limbs, if present, are arthropodized (Character 8)

See (Van Roy, Daley and Briggs 2015)*,* char 49. The cylindrical ambulacral lobopodous leg characteristic of lobopodians is also found in *Opabinia* (Budd 1996; Budd and Daley 2012)*, Kerygmachela* (Budd 1993, 1998) and *Pambdelurion* (Budd 1997). Van Roy *et al.* (Van Roy, Daley and Briggs 2013)described the radiodontan *Aegirocassis benmoulae*, which indicates that some representatives of this group possess two sets of lateral flaps that are homologous to the outer and inner branches of the appendages in euarthropods, and thus represent a derived state relative to the presence of cylindrical ambulatory legs. This character is scored for most radiodontansfollowing the data presented by Van Roy *et al.* (Van Roy, Daley and Briggs 2013); an uncertain score is coded only for *Schinderhannes* given the uncertainty regarding the morphological interpretation of this taxon (Kühl, Briggs and Rust 2009; Ortega-Hernández 2016).

## Oral structures

1. Mouth opening orientation

(0) anterior

(1) ventral

(2) posterior

Most lobopodian taxa possess an anterior mouth – for example *Aysheaia* (Whittington 1978), *Onychodictyon ferox* (Ou, Shu and Mayer 2012)and *Kerygmachela* (Budd 1993, 1998) *–* as do Eutardigrada (Halberg *et al.* 2009; Persson *et al.* 2012). The mouth opening is ventrally oriented in *Pambdelurion* (Budd 1997), radiodontans (Daley *et al.* 2009; Daley and Edgecombe 2014), and Onychophora (Eriksson and Budd 2000; Ou, Shu and Mayer 2012; de Sena Oliveira and Mayer 2013; Mayer *et al.* 2013a); it faces posteriad in *Opabinia* (Budd 1996)andupper stem-group euarthropods (Edgecombe and Ramsköld 1999; Haug *et al.* 2012; Yang *et al.* 2013). Heterotardigrada have different orientations depending on the species (Schulz 1935; Marcus 1946; Petersen 1951; Pollock 1975; Binda 1978; Ramazzotti and Maucci 1983; De Zio Grimaldi, Gallo and Lucia 1992; Dastych, McInnes and Claxton 1998; Hansen *et al.* 2012; Fujimoto 2014; Kristensen *et al.* 2015; Møbjerg, Kristensen and Jørgensen 2016; Gąsiorek *et al.* 2017a; Bartels, Fontoura and Nelson 2018; Fujimoto *et al.* 2020; Gąsiorek, Kristensen and Kristensen 2021; Kayastha *et al.* 2021; Saulenko *et al.* 2022). The mouth is orientated ventrally in *Collinsium*, as evinced by the distinctive curvature of the head region and the trace of the anterior parts of the gut (Yang *et al.* 2015). A similar organization is observed in other lobopodians, including *Hallucigenia sparsa*, *H. fortis* (Hou and Bergström 1995; Ramsköld and Chen 1998), *Microdictyon* (Chen, Zhou and Ramsköld 1995), and *Luolishania* (Ma, Hou and Bergström 2009) Murdock *et al.* (2014) (Murdock *et al.* 2014) have recently recommended that the orientation of the mouth should be interpreted with caution in fossil lobopodians based on decay experiments of extant onychophorans. With this consideration, the mouth orientation has been scored as ventral (state 1) in those taxa in which there is direct evidence of mouth orientation in combination with a well-preserved gut, as Murdock *et al.* (2014, p. 6) (Murdock *et al.* 2014) concede that the preservation of more labile structures is a good indicator of limited decay and thus authentic biological signal. This character is scored as uncertain in *Cardiodictyon* as the preservation does not allow the position of the mouth to be resolved.

1. One or more pairs of appendages located anteriorly relative to the mouth opening

*(0) absent*

*(1) present*

*(-) innaplicable; paired appendages (Character 1) absent*

This character refers to the condition observed in Onychophora, upper stem-Euarthropoda and Euarthropoda, in which either protocerebral or deutocerebral appendages are actually displaced forward relative to the mouth opening such that they occupy a pre-oral position. This character is absent in various lobopodians in which the mouth opening is located anterior to the first appendage pair, including *Aysheaia* (Whittington 1978), *Cardiodictyon* (Liu and Dunlop 2014) , *Hallucigenia* (Hou and Bergström 1995; Ramsköld and Chen 1998), *Onychodictyon ferox* (Ou, Shu and Mayer 2012)(Ou et al., 2012), *Paucipodia* (Hou *et al.* 2004) and *Antennacanthopodia* (Ou *et al.* 2011); *Collinsium* also displays this anterior organization (Yang *et al.* 2015). Although the preservation of *Jianshanopodia* (Liu *et al.* 2006; Vannier *et al.* 2014)and *Megadictyon* (Liu *et al.* 2007)obscures the most proximal morphology of the frontal appendages, there is no indication that the body wall extends beyond the bases of these limbs and the mouth; thus, the presence of additional anterior limb pairs is highly unlikely.

1. Radially symmetrical structures at the mouth opening

(0) absent

(1) present

Previous studies have considered the lip papillae of Onychophora as homologous to the circumoral structures observed in Priapulida, Tardigrada, various lobopodians (e.g. *Megadictyon*, *Kerygmachela*, *Pambdelurion*)and radiodontans by virtue of their similar position around the mouth (Daley *et al.* 2009; Liu *et al.* 2011; Legg, Sutton and Edgecombe 2013; Ma *et al.* 2014a). Recent data on the morphogenesis of the onychophoran lip papillae, however, indicate that the latter structures have a complex developmental patterning, and receive nervous terminals from the dorsal part of the brain associated with the anteriormost three-segments of the body (Eriksson and Budd 2000; Martin and Mayer 2014); thus, the onychophoran papillae do not reflect the symplesiomorphic organization of the anterior region as observed in cycloneuralians (e.g. (Storch 1991; Rothe and Schmidt-Rhaesa 2010). Given that there is no evidence that the scalids of Priapulida and the oral lamellae of Tardigrada have a similarly complex morphogenetic origin, and that it is impossible to discern whether the circumoral structures of Paleozoic lobopodians and radiodontans are analogous to the onychophoran papillae, these structures are scored as potentially homologous based on their distinctly radially symmetric arrangement around the mouth opening. Onychophorans differ considerably on this regard, as the lip papillae are circumoral but have a fundamentally bilaterally symmetrical organization (Eriksson and Budd 2000; Martin and Mayer 2014); thus, this character is scored as absent. This character is scored as present in *Jianshanopodia* (Liu *et al.* 2006) following a recent revision of the anterior morphology of this taxon by (Vannier *et al.* 2014). Mouthparts are unknown in *Aegirocassis* (Van Roy, Daley and Briggs 2015). Additionally, this character pertains to the structures that are part of the foregut (i.e., part of the mouth structures). Thus, *Aysheaia* is scored as absent since the papillate structure around its mouth are interpreted to be part of the cuticle around the mouth and not part of the mouth *per se*. This is similar to *Milnesium* that has both cephalic papillae and peribuccal lamellae (Michalczyk *et al.* 2012). The latter structures are the ones being coded for this character since they are the ones that are part of the foregut.

1. Nature of radial structures at the mouth opening

(0) scalids

(1) oral peribuccal lamellae

(2) radial plates organized as a mouth apparatus

(3) oral peribuccal lamina

(–) inapplicable: radial circumoral structures (Character 19) absent

Panarthropods express a considerable diversity of circumoral structures, which represent a symplesiomorphic feature of Ecdysozoa as a whole (e.g., (Edgecombe 2009)). *Kerygmachela* bear oral lamellae (Budd 1993, 1998); a similar feature occurs in the oral cone of some eutardigrades (Kristensen 1982; Bertolani *et al.* 2011; Michalczyk *et al.* 2012). *Isohypsibius prosostomus* has a continuous lamina unlike the separated lamellae found in some eutardigrades (Gąsiorek *et al.* 2019). *Pambdelurion* (Budd 1997) and radiodontans (Daley *et al.* 2009; Daley and Edgecombe 2014) exhibit radially arranged plates that together form a mouth apparatus (Daley and Bergström 2012). The nature of the circumoral structures in *Megadictyon* and *Jianshanopodia* (Liu *et al.* 2006; Vannier *et al.* 2014) are scored as uncertain; in the former case, the type material does not unequivocally exhibit a plate-like nature; in the latter, the documentation of the plates is inconclusive. This character is scored as inapplicable in Onychophora given that the bilaterally symmetrical lip papillae are demonstrably not homologous with the radially symmetrical circumoral structures of other taxa based on their developmental origin and neurological organization (Eriksson and Budd 2000; Martin and Mayer 2014).

1. Structure of radial plates

(0) variable number of undifferentiated plates (e.g. Pambdelurion)

(1) plates with differentiation of three or four enlarged plates (i.e. Radiodonta)

(–) inapplicable: radial plates (Character 20) absent

This character distinguishes the somewhat indistinct organization of the mouth apparatus in *Pambdelurion* (Budd 1997) from the radially arranged mouthparts of radiodontans (Daley *et al.* 2009; Daley and Bergström 2012; Daley and Edgecombe 2014). *Megadictyon* and *Jianshanopodia* are scored as uncertain to reflect their mouthparts’ poor preservation (Liu *et al.* 2006, 2007).

1. Papillate circumoral structure

(0) absent

(1) present

This character refers to the papillate structures around that mouth opening which is not part of the anterior portion of the foregut. This is evident in the tardigrade Milnesium (Michalczyk et al. 2012)and Aysheaia (more elongated in the latter taxon).

## Ocular structures

1. Eyes

(0) absent

(1) present

Character 10 in Daley *et al.* (Daley *et al.* 2009) and 25 in Ma *et al.* (Ma *et al.* 2014b)(see also (Ma *et al.* 2012). Eyes as treated as present in *Onychodictyon* *ferox* (Ou, Shu and Mayer 2012) and *Hallucigenia* *fortis* (Liu and Dunlop 2014). Eyes are scored as absent in *Aysheaia* (*contra* (Ou, Shu and Mayer 2012)following the original description by Whittington (Whittington 1978). There is no evidence that *Collinsium* possess eyes (Yang *et al.* 2015). Although the paired sclerites on the head region superficially resemble ocular structures, the lack of individual lenses or other structural organization suggestive of visual units provide no indication that these sclerites were involved in photoreception; the evidence for overlap of these structures in laterally preserved complete specimens indicates that these structures are more comparable with the laterodorsal sclerites in the trunk region of *Collinsium*.

1. Eye attachment

(0) eye sessile

(1) eye stalked

(–) inapplicable: eyes (Character 23) absent

Character 26 in Ma *et al.* (Ma *et al.* 2014b).

1. Type of eyes

*(0) single lens eye or pigment spots*

*(1) multiple visual units (including compound eyes)*

*(–) inapplicable: eyes (Character 23) absent*

Character 27 in Ma *et al.* (Ma *et al.* 2014b). This character is scored as uncertain in *Luolishania* and *Hallucigenia fortis* given that it is not possible to fully resolve the level of structural organization of the visual units due to their fragmentary preservation (Ma, Hou and Bergström 2009; Ma *et al.* 2012).

## Trunk region

1. Epidermal segmentation

(0) absent

(1) present

Character 25 in Daley *et al.* (Daley *et al.* 2009). Epidermal segmentation is a distinguishing feature of Euarthropoda (e.g. (Budd 2001; Edgecombe 2009)). Although the body of Onychophora and Tardigrada is metamerically organized, both at the level of segment polarity gene expression (Gabriel and Goldstein 2007; Eriksson *et al.* 2009) and musculature (Halberg *et al.* 2009; Marchioro *et al.* 2013), this pattern is not expressed on the epidermis: this character is thus score as absent in these phyla. *Opabinia* is scoredas present since has discrete body segments separated by furrows (Budd 1996; Zhang and Briggs 2007; Budd and Daley 2012). Epidermal segmentation is not evident in radiodontans (Daley and Edgecombe 2014), and thus is scored as absent. *Hurdia* is the exception: because the only complete specimen is partly disarticulated (Daley *et al.* 2009), the presence of epidermal segmentation is scored as ambiguous. *Schinderhannes* is scored as uncertain as the ventral perspective of the only available specimen does not allow resolving this character (Kühl, Briggs and Rust 2009).

1. Dorsal integument sclerotized and connected by arthrodial membranes

(0) absent

(1) present

The development of sclerotized tergal plates connected by arthrodial membranes is distinctive of body arthrodization, and thus exclusive to Euarthropoda (Edgecombe and Ramsköld 1999; Haug *et al.* 2012; Yang *et al.* 2013). Although some heterotardigrades possess dorsal plates (Nelson 2002; Marchioro *et al.* 2013; Persson *et al.* 2014), these are not connected by arthrodial membranes and thus score as absent for this character. *Schinderhannes* is scored as uncertain as the ventral perspective of the only available specimen does not allow resolving this character (Kühl, Briggs and Rust 2009).

1. Sternites connected by arthrodial membranes

(0) absent

(1) present

(–) inapplicable: dorsal sclerotized integument (Character 27) absent

Sternites – ventral sclerotized plates – are a key feature of most Euarthropoda and are well documented in Artiopoda (Whittington 1993; Edgecombe and Ramsköld 1999; Ortega-Hernández and Brena 2012). Sternites are notably absent in fuxianhuiids (Chen *et al.* 1995; Waloszek *et al.* 2005; Bergström *et al.* 2008; Yang *et al.* 2013), even though these taxa have a sclerotized dorsal exoskeleton. Sternites are scored as uncertain in leanchoiliids. Given that it is unknown whether *Schinderhannes* displays epidermal segmentation due to its preservation, and the fact that sternites are not observable on the ventral side (Kühl, Briggs and Rust 2009), this character is scored as uncertain.

1. Neck-like constriction on lobopodous trunk

(0) absent

(1) present

(–) inapplicable: sclerotized dorsal integument with arthrodial membranes (Character 27) present

This character is distinctive of the radiodontans *Anomalocaris*  (Whittington and Briggs 1985; Daley and Edgecombe 2014) and *Lyrarapax* (Cong *et al.* 2014). This feature is scored as absent in *Hurdia*, *Peytoia* (Whittington and Briggs 1985; Daley *et al.* 2009), *Schinderhannes* (Kühl, Briggs and Rust 2009) and *Aegirocassis* (Van Roy, Daley and Briggs 2015).

1. Annulations

(0) absent

(1) present

Character 26 in Daley *et al.* (Daley *et al.* 2009). Annulations are repeated superficial integument rings that do not reflect any pattern of body segmentation.

1. Organization of trunk annulation

(0) homonomous

(1) heteronomous

(–) inapplicable: annulations (Character 30) absent

Character 29 in Liu *et al.* (Liu *et al.* 2011), and character 27 in Daley *et al.* (Daley *et al.* 2009). This character distinguishes between annulation patterns that are uniform along the length of the trunk (homonomous) from those which display serially repeated differentiated fields (heteronomous), usually associated with the location of limbs. *Pambdelurion* is scored as uncertain, reflecting the poor preservation of the trunk (Budd 1997).

1. Epidermal evaginations

(0) absent

(1) present

This character refers to the differentiated epidermal evaginations found on the dorsal side of most lobopodians. This character has been modified from the definition used by Smith and Ortega-Hernández (2014) (Smith and Ortega-Hernández 2014) to reflect the hypothesis that the epidermal specializations of lobopodians may be homologous to those observed in numerous paleoscolecid taxa known from Cambrian deposits, such as *Cricocosmia*. (Dzik and Krumbiegel 1989; Han *et al.* 2007). Consequently, this character is scored as absent, rather than inapplicable, for *Tubiluchus*. The epidermal specialization is usually conspicuous, as in the paired nodes of *Xenusion* (Dzik and Krumbiegel 1989), *Hadranax* (Budd and Peel 1998), and *Kerygmachela* (Budd 1993, 1998); the sclerotized plates of *Onychodictyon* (Zhang and Aldridge 2007; Ou, Shu and Mayer 2012); the spines of *Hallucigenia* (Ramsköld 1992; Hou and Bergström 1995; Steiner *et al.* 2012) and *Orstenotubulus* (Maas *et al.* 2007); as well as the elaborate armature of some Luolishaniidae (Ma, Hou and Bergström 2009; García-Bellido *et al.* 2013; Yang *et al.* 2015; Caron and Aria 2020). *Schinderhannes* (Kühl, Briggs and Rust 2009) is scored as uncertain as the only available specimens are preserved from a ventral perspective. The coding for *Aysheaia* has also been modified (i.e., to absent) from that used in Smith and Ortega-Hernández (2014, char. 32) (Smith and Ortega-Hernández 2014) based on direct observations of type fossil material on this paper since the putative subcircular specializations of *Aysheaia* actually represent the insertion of the lobopodous limbs on the opposite side of the body wall (Whittington 1978). This character has also been scored as absent for *Paucipodia*, as the structures previously identified as possible epidermal specializations also correspond to the insertion site of the appendages on the body wall (Hou *et al.* 2004). Heterotardigrades that are known to have thick dorsal cuticular plates (Petersen 1951; De Zio Grimaldi, Gallo and Lucia 1992; Hansen *et al.* 2012; Fujimoto 2014; Kristensen *et al.* 2015; Gąsiorek *et al.* 2017a; Kayastha *et al.* 2021) are scored as present.

1. Proportions of epidermal trunk evaginations

(0) wider than tall (e.g., nodes or plates)

(1) taller than wide (e.g., spines)

(–) inapplicable: epidermal evaginations (Character 32) absent

Epidermal evaginations fall into two geometric categories: flat nodes or plates (state 0) and tall spines (state 1). Although the distal portions of the evaginations of *Orstenotubulus* are not preserved (Maas *et al.* 2007), a spine-like habit is inferred from the proportions of the dorsal stubs. Although the epidermal evaginations in *Hallucigenia hongmeia* change slightly in their proportions throughout the trunk region (Steiner *et al.* 2012), this character is scored as state 1 based on the prevalence of spine-like dorsal sclerites.

1. Trunk epidermal evaginations with acute distal termination

(0) absent

(1) present

(–) inapplicable: epidermal evaginations (Character 32) absent

This character refers solely to the shape of the trunk evaginations’ apices. It is independent from the evaginations’ proportions (Character 33), as demonstrated by *Onychodictyon ferox*, where sclerites are wider than tall (i.e. plates) but display an acute distal termination (Zhang and Aldridge 2007; Ou, Shu and Mayer 2012; Topper *et al.* 2013). *Orstenotubulus* is scored as uncertain given the incomplete preservation of the distal components of the epidermal evaginations (Maas *et al.* 2007).

1. Acute distal termination in epidermal evagination is curved

(0) absent

(1) present

(–) inapplicable: epidermal evaginations, if present, lack an acute distal terminus (Character 34)

The spines of *Hallucigenia* *fortis* (Hou and Bergström 1995), *H. hongmeia* (Steiner *et al.* 2012), *Luolishania* (Ma, Hou and Bergström 2009), Emu Bay Collins’ Monster (García-Bellido *et al.* 2013), *Collinsium* (Yang *et al.* 2015), *Collinsovermis* and *Acinocricus* (Caron and Aria 2020) are distinctively curved, whereas those of *H. sparsa* (Conway Morris 1977), *Onychodictyon ferox* (Topper *et al.* 2013), and *O. gracilis* (Liu *et al.* 2008) are essentially straight. Following the results presented by Murdock et al. (2014) (Murdock *et al.* 2014) on the durability against decay of jaws and claws in onychophorans, the curvature in the dorsolateral sclerites can be regarded as an original biological signal given their substantial degree of sclerotization, and also possible light phosphatic biomineralization (Caron, Smith and Harvey 2013).

1. Sclerotization of epidermal evaginations

(0) absent

(1) present

(–) inapplicable: epidermal evaginations (Character 32) absent

The epidermal evaginations of several ‘armored’ lobopodians are substantially sclerotized (Hou and Bergström 1995; Steiner *et al.* 2012; Caron, Smith and Harvey 2013), in contrast to those of *Hadranax* (Budd and Peel 1998) and *Kerygmachela* (Budd 1993, 1998).

1. Sclerites consist of a stack of constituent elements

(0) absent

(1) present

(–) inapplicable: epidermal evaginations (Character 32) absent

Where sclerites are not preserved in sufficient detail to assess their construction (e.g. *Luolishania*), this character is coded as ambiguous. This character is scored as present in *Collinsium*  (Yang *et al.* 2015), as the structural organization of the dorsal spines indicates the presence of several constituent elements expressed as the cone-in-cone organization (Caron, Smith and Harvey 2013). *Hallucigenia sparsa* is also scored as present due to their dorsal spines being composed of constituent elements (Smith and Ortega-Hernández 2014).

1. Maximum number of primary dorsal epidermal evaginations above each leg pair

(0) one

(1) two

(2) three

(3) four

(4) five

(5) six and above

(–) inapplicable: epidermal evaginations (Character 32) absent

*Cricocosmia* is scored as having paired epidermal specializations (Han *et al.* 2007). *Cardiodictyon* is also coded with two epidermal specializations (state 1), following suggestions that the apparently single dorsal sclerite is formed by the fusion of a pair of elements (Liu and Dunlop 2014). The sclerite-series in *Collinsium* consist of five epidermal specializations, including a long dorsal spine, two shorter dorsolateral spines, and two smaller lateral spines (Yang *et al.* 2015). *Collinsovermis* is scored based on the redescription of the Burgess Shale Collins’ monster (Caron and Aria 2020). *Acinocricus* is scored based on reassessment of the holotype and other type materials (Caron and Aria 2020). This character is scored as uncertain in Heterotardigrada given the complex integration of dorsal plates in these organisms.

1. Dorsal sclerotized spine-like evaginations of variable length along the body

*(0) similar length along body*

*(1) variable length along the body*

*(–) inapplicable: epidermal evaginations (Character 32) absent; epidermal evaginations taller than wide (Character 33) absent*

The dorsolateral spines in most armored lobopodians maintain a similar length throughout the body (e.g., *Hallucigenia* *sparsa*). Spines with variable length are observed in *Collinsium* (Yang *et al.* 2015), *H.* *hongmeia* (Steiner *et al.* 2012), *Luolishania* (Ma, Hou and Bergström 2009), the Emu Bay Shale Collins’ monster (García-Bellido *et al.* 2013) and *Acinocricus* (Conway Morris and Robison 1988). *Collinsovermis* is scored based on the redescription of the Burgess Shale Collins’ monster (Caron and Aria 2020). *Orstenotubulus* is scored as uncertain given the incomplete preservation of the distal portions of the dorsal spines (Maas *et al.* 2007).

1. Spacing between dorsolateral epidermal evaginations along longitudinal body axis

*(0) epidermal evaginations regularly spaced*

*(1) epidermal evaginations irregularly spaced*

*(–) inapplicable: epidermal evaginations (Character 32) absent*

The epidermal evaginations present in most lobopodian taxa follow a regular spacing between them along the long axis of the body. In *Collinsium* (Yang *et al.* 2015) and *Luolishania* (Ma, Hou and Bergström 2009), however, the anteriormost and posteriormost thirds of the dorsolateral spines are spaced at regular intervals, but the spines on the middle region of the body are positioned further apart relative to each other. *Collinsovermis* is scored based on the redescription of the Burgess Shale Collins’ monster (Caron and Aria 2020). *Acinocricus* is scored based on reassessment of the holotype and other type materials (Caron and Aria 2020). This character is scored as uncertain for the Emu Bay Shale Collins’ monster (García-Bellido *et al.* 2013) given that the incomplete preservation of the only known specimens does not allow this condition to be verified.

1. Papillae on trunk annulations

(0) absent

(1) present

(–) inapplicable: annulations (Character 30) absent

Character 41 in Ma *et al.* (Ma *et al.* 2014b). *Collinsovermis* is scored based on the redescription of the Burgess Shale Collins’ monster (Caron and Aria 2020). *Orstenotubulus* is scored as uncertain as its papillae are not clearly observed throughout the trunk region (Maas *et al.* 2007).

1. Serially repeated mid-gut glands

(0) absent

(1) reniform, submillimetric lamellar

Character 42 in Ma *et al.* (Ma *et al.* 2014b); character 16 in Daley *et al.* (Daley *et al.* 2009). The presence of this character for lobopodians has been scored following a conservative approach based on decay experiments in onychophorans indicating that the detachment between the procuticle and epicuticle can produce taphonomic artefacts that superficially resemble gut diverticulae (Murdock *et al.* 2014). Therefore, this character is scored as uncertain in *Antennacanthopodia* (Ou *et al.* 2011) as the dark infilling of the type material may represent decayed internal organs. This character is scored as absent in *Collinsium* given that the gut displays a consistently simple morphology throughout the body (Yang *et al.* 2015). *Collinsovermis* is scored based on the redescription of the Burgess Shale Collins’ monster (Caron and Aria 2020). The presence of this character for the lobopodians *Megadictyon*, *Jianshanopodia*, *Pambdelurion* and *Opabinia* follows new information presented by Vannier *et al.* (2014) (Vannier *et al.* 2014)*.* Unlike other radiodontans, paired midgut glands seem to be absent in *Lyrarapax* (Cong *et al.* 2014). This character is scored as absent for *Acinocricus* based on the putative preservation of a straight gut on the holotype specimen (see “central zone” in (Conway Morris and Robison 1988)).

## Trunk appendages

1. Trunk exites

*(0) absent*

*(1) present*

*(–) inapplicable: paired appendages (Character 1) absent*

Character 20 in Van Roy *et al.* (Van Roy, Daley and Briggs 2015). *Schinderhannes* (Kühl, Briggs and Rust 2009) is scored as uncertain as the only available specimen is preserved from a ventral perspective.

1. Exite organization

(0) lanceolate dorsal blades

(1) simple oval paddle with marginal spines

(2) bipartite shaft with lamellar setae

(3) numerous podomeres, each bearing a single setae

(4) book gills

(–) inapplicable: trunk exites (Character 43) absent

The recent description of Aegirocassis (Van Roy, Daley and Briggs 2015) clarifies the relationship of the dorsal lanceolate blades in gilled lobopodians and radiodontans, and their homology with the exites of upper-stem Euarthropoda.

1. Exites/lanceolate dorsal blades associated with dorsolateral flaps

(0) absent

(1) present

(–) inapplicable: post-ocular limbs biramous (Character 47) present

Character 21 in Van Roy *et al.* (Van Roy, Daley and Briggs 2015). This character reflects the diversity observed in Radiodonta, in which the dorsolateral flaps may be lost in some taxa, such as *Anomalocaris* (e.g. (Daley and Edgecombe 2014)) and *Lyrarapax* (Cong *et al.* 2014). The coding of this character differs slightly from that used by Van Roy *et al.* (Van Roy, Daley and Briggs 2015) in that it is coded as inapplicable for taxa with fused biramous limbs and completely body arthrodization and limb arthropodization

1. Exite/setal blade distribution

(0) confined laterally

(1) present dorsally

(-) inapplicable: exites (Character 43) absent or dorsal integument sclerotized (Character 27) present.

Character 51 in Van Roy et al. (2015) (Van Roy, Daley and Briggs 2015).

1. Dorsal flaps/exites fused with endopod into biramous appendage

(0) not fused

(1) fused

(–) inapplicable: trunk exites (Character 43) absent

Character 57 in Van Roy *et al*. (Van Roy, Daley and Briggs 2015).

1. Antero-posteriorly compressed protopodite with gnathobasic endites in post-deutocerebral appendage pair

(0) absent

(1) present

(–) inapplicable: post-ocular appendages (Character 8) not arthropodized

Character 8 of Ma *et al.* (Ma *et al.* 2014b), 35 in Daley *et al.* (Daley *et al.* 2009). Gnathobasic appendages are absent in fuxianhuiids (Chen *et al.* 1995; Waloszek *et al.* 2005; Bergström *et al.* 2008; Yang *et al.* 2013) but present in Artiopoda (Edgecombe and Ramsköld 1999; Ortega-Hernández, Legg and Braddy 2013) and megacheirans (Chen, Waloszek and Maas 2004; Haug, Briggs and Haug 2012; Haug *et al.* 2012).

1. Secondary structures on the first ambulatory lobopodous limbs

(0) absent

(1) present

(–) inapplicable: post-ocular appendages (Character 8) not lobopodous

Modified from character 9 in Ma *et al.* (Ma *et al.* 2014b). This character refers to the first lobopodous limbs that are used for locomotion. *Onychodictyon gracilis* is coded as uncertain as its longitudinal series of dot-like structures (Liu *et al.* 2008) could indicate an organization of appendicules similar to those of *O. ferox* (Ou, Shu and Mayer 2012). *Collinsium* and other members of Luolishaniidae are typified by the presence of conspicuous secondary structures on the lobopodous limbs that are expressed as long setae.

1. Organization of secondary structures on first ambulatory lobopodous limbs

*(0) individual (i.e., irregular spacing)*

*(1) in rows*

*(–) inapplicable: secondary structures on the first ambulatory lobopodous limbs (Character 50) absent*

This character describes the arrangement of the secondary structures on the first ambulatory lobopodous limbs which can appear in two ways. The first is the irregularly spaced (individual spines are included in this criteria), such as in *Aysheaia* and some heterotardigrades (e.g., (Møbjerg, Kristensen and Jørgensen 2016; Fujimoto *et al.* 2020; Gąsiorek, Kristensen and Kristensen 2021; Kayastha *et al.* 2021). The other is in rows, such as the spines of Luolishoniids (e.g., (Ma, Hou and Bergström 2009; Yang *et al.* 2015; Caron and Aria 2020)).

1. Secondary structures on the second ambulatory lobopodous limbs

(0) absent

(1) present

(–) inapplicable: post-ocular appendages (Character 8) not lobopodous

Similar to character 49 but refers to the second lobopodous limbs that are used for locomotion. In some heterotardigrades (e.g. (Fujimoto 2014; Gąsiorek *et al.* 2017a; Bartels, Fontoura and Nelson 2018)), the secondary structures can be present or absent depending on the order of the legs (i.e., present in the first pair of limbs, but absent in the second pair of limbs).

1. Organization of secondary structures on second ambulatory lobopodous limbs

(0) individual (i.e., irregular spacing)

(1) in rows

(–) inapplicable: secondary structures (Character 51) absent

Similar to character 50 but refers to the second lobopodous limbs that are used for locomotion.

1. Finger-like elements in distal tip of lobopodous limbs

(0) absent

(1) present

(–) inapplicable: paired appendages (Character 1) absent

*Antennacanthopodia* is scored as uncertain as the preservation of the available material is not good enough to distinguish fine detail of the distal portion of the limbs (Ou *et al.* 2011). In *Archechiniscus*, claws have both the digitate and non-digitate morphology (Bartels, Fontoura and Nelson 2018).

1. Secondary structures on posterior-most ambulatory lobopodous limbs

(0) absent

(1) present

(–) inapplicable: post-ocular appendages (Character 8) not lobopodous

Similar to character 49 but refers to the last lobopodous limbs that are used for locomotion. In some heterotardigrades (e.g. (Binda 1978)) and luolishoniids (e.g. (Ma, Hou and Bergström 2009; Yang *et al.* 2015)), the secondary structures can be present or absent depending on the order of the legs (i.e., present in the first pair of limbs, but absent in the last pair of limbs)

1. Organization of secondary structures on posterior-most ambulatory lobopodous limbs

*(0) individual (i.e., irregular spacing)*

*(1) in rows*

*(–) inapplicable: secondary structures (Character 54) absent*

Similar to character 50 but refers to the last lobopodous limbs that are used for locomotion.

1. Terminal claws on trunk lobopodous limbs

(0) absent

(1) present

(–) inapplicable: paired appendages (Character 1) absent or appendages not lobopodous (Character 8)

Terminal claws are scored as absent in *Opabinia* following Budd and Daley (Budd and Daley 2012). *Jianshanopodia* (Liu *et al.* 2006), and *Megadictyon* (Liu *et al.* 2007)are coded as uncertain as the preservation of the type material does not allow the presence or absence of terminal claws to be confirmed. *Diania* too is scored as uncertain, as it is difficult to distinguish possible terminal claws from its myriad accessory spines (Liu *et al.* 2011; Ma *et al.* 2014b). This character is scored as present in *Luolishania* (Ma, Hou and Bergström 2009)based on the presence of robust curved claws on the posterior appendages. *Batillipes* is scored as absent since they have suction discs at the end of their legs, instead of claws (Marcus 1946).

1. Organization of terminal claws on lobopodous limbs

*(0) unfused scythe-like (i.e., with evident straight, long stalk)*

*(1) unfused semilunar-like (i.e., no evident stalk)*

*(2) fused claws*

*(–) inapplicable: terminal claws (Character 56) absent or post-ocular appendages (Character 8) not lobopodous*

This character refers to the morphology of the claws observed at the end of the legs.

1. Number of claws on trunk lobopodous limbs

*(0) one*

*(1) two*

*(2) three*

*(3) four*

*(4) six or more (supernumerary)*

*(–) inapplicable: terminal claws (Character 56) absent or post-ocular appendages (Character 8) not lobopodous*

Modified from character 18 in Ma *et al.* (Ma *et al.* 2014b)to better reflect the diversity of claw number in Cambrian lobopodians. *Cardiodictyon* unambiguously has two claws (Ramsköld and Chen 1998). *Luolishania* is scored as having a single strongly curved claw based on the well preserved sclerites on the posterior legs; the interpretation of this taxon as having four claws on the anterior elongated limbs is questioned given that it is not possible to distinguish between terminal spines and the elongate setae that characterize the appendages (Ma, Hou and Bergström 2009). The condition of *Luolishania* is closely reminiscent to those found in *Collinsium* (Yang *et al.* 2015)and the Emu Bay Collins’ monster (García-Bellido *et al.* 2013). *Acinocricus* (Conway Morris and Robison 1988; Caron and Aria 2020) is scored as uncertain as the available photographic material does not allow such fine morphological detail to be resolved. *Collinsovermis* is scored based on the redescription of the Burgess Shale Collins’ monster (Caron and Aria 2020).

1. Symmetry of fused claws

(0) asymmetrical

(1) symmetrical

(–) inapplicable: terminal claws (Character 56) absent

In eutardigrades, the symmetry of the fused claws relative to the leg axis is a major distinguishing character between superfamilies (Marley, Mcinnes and Sands 2011).

1. Differentiated distal foot in lobopodous trunk limbs

(0) absent

(1) present

(–) inapplicable: paired appendages (Character 1) absent; post-ocular appendages arthropodized (Character 8); inner branch modified as lateral flaps (Character 16).

The presence of a moveable foot is a synapomorphic feature of crown-group Onychophora (e.g., (Thompson and Jones 1980; Poinar 2000; de Sena Oliveira and Mayer 2013)).

1. Hypertrophied set of anterior body flaps

(0) absent

(1) present

(–) inapplicable: inner branch is not a lateral flap (Character 16); dorsolateral flaps (Character 45) absent

This character applies to the enlarged pair of body flaps observed in the Hünsruck radiodontan *Schinderhannes* (Kühl, Briggs and Rust 2009) and in the recently described *Lyrarapax* from the Chengjiang (Cong *et al.* 2014).

1. Strengthening rays in lateral flaps

(0) absent

(1) present

(–) inapplicable: inner branch is not a lateral flap (Character 16); dorsolateral flaps (Character 45) absent

Character 37 in Daley *et al.* (Daley *et al.* 2009).

1. Posterior tapering of lateral flaps

(0) absent

(1) present

(–) inapplicable: inner branch is not a lateral flap (Character 16); dorsolateral flaps (Character 45) absent

Character 40 in Daley *et al.* (Daley *et al.* 2009).

1. Anterior sets of reduced lateral flaps

*(0) absent*

*(1) present*

*(–) inapplicable: inner branch is not a lateral flap (Character 16); dorsolateral flaps (Character 45) absent*

This character applies to the presence of a series of reduced flaps in the anterior trunk region of various radiodontans (e.g., (Whittington and Briggs 1985; Daley *et al.* 2009; Cong *et al.* 2014; Daley and Edgecombe 2014). The presence of reduced lateral flaps is independent from the presence of a neck-like constriction, as *Peytoia* features the former but not the latter character. Scored as uncertain in *Aegirocassis* (Van Roy, Daley and Briggs 2015) and *Schinderhannes* (Kühl, Briggs and Rust 2009) as the preservation of these taxa does not allow recognizing this feature.

1. Lobopodous limbs differentiated into two batches of multiple anterior/long and posterior/short limbs

(0) absent

(1) present

(–) inapplicable: limbs (Character 8) not lobopodous

Character 38 in Ma *et al.* (Ma *et al.* 2014b). This condition is distinctive of all members of Luolishaniidae (Conway Morris and Robison 1988; Ramsköld and Chen 1998; Ma, Hou and Bergström 2009; García-Bellido *et al.* 2013; Yang *et al.* 2015; Caron and Aria 2020). This character is scored as absent for *Hadranax* as a significant portion of the body is preserved (Budd and Peel 1998) and shows no indication of limb differentiation. The last pair of limbs of tardigrades has a different orientation compared to the first three pairs of limbs, but their morphology is relatively the same (Møbjerg *et al.* 2018). Furthermore, leg patterning genes have similar patterns of expression in all four pairs of limbs during embryonic development (Game and Smith 2020; Mapalo *et al.* 2024). Because of these morphological and developmental similarities, this character is scored as absent (*contra* (Kihm *et al.* 2023a)).

1. Number of anterior morphologically differentiated elongated limbs

*(0) five* (Luolishania, Acinocricus, *Collins’ monster EBS*)

*(1) six* (Collinsium*,* Collinsovermis)

(–) inapplicable: paired appendages (Character 1) absent; morphologically distinct appendage batches (Character 65) absent

*Acinocricus* is scored as having five morphologically distinct anterior appendages following reassessment of its holotype (Caron and Aria 2020).

1. Appendages comprise 15 or more podomeres

(0) Fewer than 15 podomeres

(1) 15 or more podomeres

(–) inapplicable: limbs (Character 8) not arthropodized

The endopods of certain taxa in the euarthropod stem-group, such as fuxianhuiids, bear 15 or more podomeres and are considered ‘multipodomerous’ (Chen *et al.* 1995; Waloszek *et al.* 2005; Bergström *et al.* 2008; Yang *et al.* 2013).

## Posterior termination

1. Limbless posterior extension beyond last appendage pair

(0) absent

(1) present

(–) inapplicable: paired appendages (Character 1) absent

This character refers to all types of posterior extensions that can be seen beyond the last pair of appendages.

1. Posterior appendicular tail flaps beyond last appendage pair

(0) absent

(1) present

(–) inapplicable: paired appendages absent (Character 1)

This character refers to the flaps that is present beyond the last pair of appendages. This can be observed in *Jianshanopodia* (Liu *et al.* 2006), *Opabinia* (Budd 1996; Budd and Daley 2012), some radiodontans (Daley *et al.* 2009; Daley and Edgecombe 2014), and fuxianhuiids (Yang *et al.* 2013).

1. Claws on posterior lobopodous appendages directed anteriad

(0) normal orientation (claws pointing posteriad)

(1) rotated anteriad

(–) inapplicable: appendages lack terminal claws (Character 56) and appendages not lobopodous (Character 8)

The last pair of legs are rotated anteriad in tardigrades (Marchioro *et al.* 2013), *Aysheaia* (Whittington 1978), *Onychodictyon ferox* (Ou, Shu and Mayer 2012), but not in *Cardiodictyon*, *Hallucigenia* *fortis* or *Microdictyon* (Hou and Bergström 1995). Although Liu *et al.* (2008) (Liu *et al.* 2008) report that the claws on the 8th leg of a specimen of *O. gracilis* point in opposite directions, this refers to the fact that the two claws within the same limb are orientated in such a conformation, rather than suggesting that the claws point anteriad relative to the other clawed appendages. *Hallucigenia* *sparsa* is coded as uncertain owing to the poor preservation of its posterior end.

## Soft tissue organization

1. Dorsal heart

(0) absent

(1) present

See character 86 in Yang *et al.* (Yang *et al.* 2015).

1. Dorsal condensed brain

(0) absent

(1) present

See character 82 in Yang *et al.* (Yang *et al.* 2015).

1. Number of neuromeres integrated into the dorsal condensed brain

(0) one

(1) two

(2) three

(–) inapplicable: dorsal condensed brain (Character 72) absent

See character 83 in Yang *et al.* (Yang *et al.* 2016). *Limulus* and *Triops* are scored as having three brain neuromeres based on ample neurological data on these model organisms (Mittmann and Scholtz 2003; Harzsch *et al.* 2005; Fritsch and Richter 2010).

1. Mouth innervation relative to brain neuromeres

(0) protocerebral innervation

(1) deutocerebral innervation

(2) tritocerebral innervation

(3) innervation from multiple neuromeres

(–) inapplicable: condensed dorsal brain (Character 72) absent

See character 84 in Yang *et al.* (Yang *et al.* 2016).

1. General organization of ventral nerve cord

*(0) unpaired*

*(1) paired*

See character 85 in Yang et al (Yang *et al.* 2016). *Ottoia* was coded as unpaired based on its recent redescription and comparison to extant priapulids (Wang *et al.* 2025).

1. Ventral nerve cord with morphologically discrete condensed hemiganglia connected by median commissures

(0) absent

(1) present

Tardigrada and Euarthropoda have a rope-ladder-like ventral nerve cord with morphologically discrete condensed ganglia (Harzsch and Waloszek 2000; Mittmann and Scholtz 2003; Harzsch *et al.* 2005; Fritsch and Richter 2010; Richter *et al.* 2010; Persson *et al.* 2012; Schulze, Neves and Schmidt-Rhaesa 2014; Gross and Mayer 2015), in contrast to the ladder-like ventral nerve cord of Onychophora (Mayer *et al.* 2013b). The presence of median commissures has been recently demonstrated in Tardigrada (Mayer *et al.* 2013a, 2013b; Schulze, Neves and Schmidt-Rhaesa 2014), and thus suggests that the possession of ganglia and transverse commissures represent fundamentally linked neurological features. Priapulida have an unpaired nerve cord associated with a net-like system of neural connectives (Rothe and Schmidt-Rhaesa 2010), and thus this character is scored as absent. Recent data confirms the presence of condensed ganglia in *C. kunmingensis* (Yang *et al.* 2013, 2016). The early Cambrian megacheiran *Alalcomenaeus* sp. also possesses a ventral nerve cord with condensed ganglia (Tanaka *et al.* 2013).Condensed ganglia are scored as uncertain in *Lyrarapax* (Cong *et al.* 2014) as the preservation of this taxon does not allow the organization of the ventral nerve cord to be resolved. The lobopodian *P. inermis* has been described as possessing condensed ganglia (Hou *et al.* 2004). Given that the veracity of these observations has yet to be confirmed by additional study of the material, this character is treated as uncertain in the main analysis. *Ottoia* was coded as absent based on its recent redescription and comparison to extant priapulids (Wang *et al.* 2025).

1. Paired nerve cord with median interpedal commissures

(0) absent

(1) present

(-) inapplicable; ventral nerve cord unpaired (Character 75).

See character 88 in Yang *et al.*(Yang *et al.* 2016).

1. Nerve cord with orthogonal organization

(0) absent

(1) present

The nerve cord of Priapulida (Richter *et al.* 2010; Rothe and Schmidt-Rhaesa 2010) and Onychopora (Mayer and Harzsch 2007; Mayer *et al.* 2013b) displays a typical orthogonal organization, consisting of several ring-like commissures and peripheral nerves that intersect with additional dorsal and lateral longitudinal nerve strands, forming a distinctive net-like pattern. The nervous system of Tardigrada also displays dorsal and lateral longitudinal nerves that are intersected by transverse peripheral nerves (Persson *et al.* 2012; Schulze and Schmidt-Rhaesa 2013; Schulze, Neves and Schmidt-Rhaesa 2014; Gross and Mayer 2015), although these organisms lack complete ring- commissures (see Character 79). Schulze and Schmidt-Rhaesa (Schulze and Schmidt-Rhaesa 2013) reported loop-like neurites that extend dorsally in *E. testudo*; this organization is similar to that observed in eutardigrades (Mayer *et al.* 2013b) and thus this character is scored as present. However, an orthogonal-like organization has not been resolved in the heterotardigrades *B. pennaki* and *A. doryphorus* (Schulze, Neves and Schmidt-Rhaesa 2014); pending additional data, this character is scored as uncertain as it is unknown whether this absence of legitimate, or whether this aspect of the morphology has not been resolved due to differences in specimen fixation and/or ontogeny. Given the different observations in this phylum, tardigrades without record of VNC morphology are also coded as uncertain. Although the presence of peripheral nerves (see Character 82) throughout the ventral nerve cord of *C. kunmingensis* may suggest the presence of an orthogonal-like organization, as expressed in Onychophora, this character is conservatively scored as uncertain due to the lack of distal preservation of the nerve roots.

1. Orthogonal nerve cord with complete ring-commissures

(0) absent

(1) present

(-) inapplicable; ventral nerve cord organization is not orthogonal (Character 78).

See character 90 in Yang *et al.*(Yang *et al.* 2016).

1. Segmental leg nerves shifted anteriorly relative to appendages following parasegmental organization

(0) absent

(1) present

(-) inapplicable; paired appendages absent (Character 1).

See character 91 in Yang *et al.*(Yang *et al.* 2016).

1. Paired segmental leg nerves

(0) absent

(1) present

(-) inapplicable; paired appendages absent (Character 1).

See character 92 in Yang *et al.*(Yang *et al.* 2016).

1. Regularly spaced peripheral nerves running entire length of nerve cord

(0) absent (Tardigrada, crown-group Euarthropoda)

(1) present (Priapulida, Onychophora, Chengjiangocris)

See character 93 in Yang *et al.*(Yang *et al.* 2016).

## Additional characters

1. Cephalic cirri

(0) absent

(1) present

This character refers to the cuticular extensions evident on the cephalic region of heterotardigrades that are suggested to serves as mechanoreceptors (Fontoura *et al.* 2017). In apochelans (e.g., *Milnesium*), the cephalic papillae are homologized to the external cirri of heterotardigrades (Kihm *et al.* 2023b). In other eutardigrades (i.e., parachelans), these extensions are lost and appear as sensory fields (Gross, Epple and Mayer 2021; Kihm *et al.* 2023b).

1. Median cirrus

(0) absent

(1) present

(-) inapplicable; cephalic cirrus (character 84) absent

This character refers to the unpaired cirrus found on the dorsal side of the cephalic region found in majority of marine heterotardigrades (Fontoura *et al.* 2017).

1. Telescopic legs

(0) absent

(1) present

(-) inapplicable; paired appendages absent (character 1)

In some marine heterotardigrades, the legs appear to be superficially segmented and can be telescopic (Fontoura *et al.* 2017). See character 34 in Jørgensen et al. (Jørgensen, Møbjerg and Kristensen 2011).

1. Placoids

(0) absent

(1) present

In some tardigrades, the pharynx has cuticular thickening called placoids (Møbjerg *et al.* 2018). See character 26 in Jørgensen et al (Jørgensen, Møbjerg and Kristensen 2011), and character 32 and 35 in Mapalo et al (Mapalo, Wolfe and Ortega-Hernández 2024).

1. Eversible mouthparts

*(0) absent*

*(1) present*

This character refers to the ability of some lobopodians to evert some of their mouthparts, particularly the foregut.

1. Number of trunk limbs

(0) less than or equal to four pairs

(1) more than four pairs

(–) inapplicable: paired appendages (Character 1) absent

1. Lunules at the base of fused claws

*(0) absent*

*(1) present*

*(–) inapplicable: terminal claws (Character 56) absent; claw not fused (Character 57)*

Paracheland tardigrades belonging to Eohypsibioidea (e.g., *Eohypsibius*) and Macrobiotoidea (e.g., *Macrobiotus*) have claws with well-defined cresent-shaped basal extensions called lunules that are connected to the rest of the claws via a peduncle. In other parachelan groups, such as Isohypsibioidea (e.g., *Isohypsibius*) and Hypsibioidea (e.g., *Hypsibius*), claws have pseudolunules which are thinner and connected directly at the claw base (i.e., no peduncle) (Gąsiorek *et al.* 2017b).

1. Bulbous pharynx (i.e., differentiated foregut)

*(0) absent*

*(1) present*

Among ecdysozoans, the foregut can have differentiated width as evinced by a bulbous pharynx such as in priapulids (Todaro and Shirley 2003), *Aysheaia* (this study), *Onychodictyon ferox* (Ou, Shu and Mayer 2012), *Kerygmachela* (Park *et al.* 2018), onychophorans (Ou, Shu and Mayer 2012), and tardigrades (Møbjerg *et al.* 2018). Some extinct lobopodians, such as *Paucipodia* (Hou *et al.* 2004), *Hallucigenia sparsa* (Smith and Caron 2015) andluolishaniids (Ma, Hou and Bergström 2009; Yang *et al.* 2015; Caron and Aria 2020).

1. Caudal appendage on the body lacking paired appendages

*(0) absent*

*(1) present*

*(-) inapplicable: paired appendages (Character 1) present*

Most extant priapulids have caudal appendages that can either have anchor-like (e.g., *Tubiluchus*) or assumed respiratory (e.g., *Priapulus*) function (Raeker *et al.* 2025).

1. Terminal hooks on the body lacking paired appendages

*(0) absent*

*(1) present*

*(-) inapplicable: paired appendages (Character 1) present*

Extinct vermiform ecdysozoans often display hooks at the end of their body, such as in *Ottoia* (Smith, Harvey and Butterfield 2015) and *Cricocosmia* (Han *et al.* 2007).

1. Body length

*(0) below 2 mm*

*(1) equal to or above 2 mm*

Species that have a body length (i.e., from the anterior end up to the posterior end, including any tail or caudal region) below 2 mm are considered microscopic, while those not within this range are macroscopic. The estimated size of *Orstenotubulus* is macroscopic (i.e., 4-5 mm), but the current incomplete specimens are microscopic (Maas *et al.* 2007). Pending the discovery of a complete specimen to confirm its size, *Orstenotubulus* is coded as uncertain.

1. First pair of lobopodous limbs

(0) external

(1) internalized (i.e., into stylets in tardigrades)

(–) inapplicable: paired appendages (Character 1) absent

This character is used for the “stylet hypothesis” which assumes that the 1st pair of limbs of tardigrades underwent modification and became internalized stylet apparatus. This hypothesis is derived from the fact that both stylets and claws are produced by glands (Halberg *et al.* 2009; Møbjerg *et al.* 2018), and the muscles attached to both the stylets and claws have similar morphology (Halberg *et al.* 2009).

Bartels PJ, Fontoura P, Nelson DR. Marine tardigrades of the Bahamas with the description of two new species and updated keys to the species of Anisonyches and Archechiniscus. *Zootaxa* 2018;**4420**:43–70.

Bergström J, Hou X, Zhang X *et al.* A new view of the Cambrian arthropod *Fuxianhuia*. *GFF* 2008;**130**:189–201.

Bertolani R, Rebecchi L, Giovannini I *et al.* DNA barcoding and integrative taxonomy of Macrobiotus hufelandi C.A.S. Schultze 1834, the first tardigrade species to be described, and some related species. *Zootaxa* 2011;**36**:19–36.

Binda MG. Risistemazione di alcuni tardigradi con l’istituzione di un nuovo genere di Oreellidae e della nuova famiglia Archechiniscidae. *Animalia* 1978;**5**:307–14.

Budd G, Peel J. A new xenusiid lobopod from the Early Cambrian Sirius Passet fauna of North Greenland. *Palaeontology* 1998;**41**:1201–1213.

Budd GE. A Cambrian gilled lobopod from Greenland. *Nature* 1993;**364**:709–11.

Budd GE. The morphology of *Opabinia regalis* and the reconstruction of the arthropod stem-group. *Lethaia* 1996;**29**:1–14.

Budd GE. Stem-group arthropods from the Lower Cambrian Sirius Passet fauna of North Greenland. In: Fortey RA, Thomas RH (eds.), *Arthropod Relationships*. London: Chapman and Hall, 1997, 125–38.

Budd GE. The morphology and phylogenetic significance of *Kerygmachela kierkegaardi* Budd (Buen Formation, Lower Cambrian, N Greenland). *Trans R Soc Edinb Earth Sci* 1998;**89**:249–90.

Budd GE. Why are arthropods segmented? *Evol Dev* 2001;**3**:332–42.

Budd GE. A palaeontological solution to the arthropod head problem. *Nature* 2002;**417**:271–5.

Budd GE. Head structure in upper stem-group euarthropods. *Palaeontology* 2008;**51**:561–73.

Budd GE, Daley AC. The lobes and lobopods of *Opabinia regalis* from the middle Cambrian Burgess Shale. *Lethaia* 2012;**45**:83–95.

Caron JB, Aria C. The Collins’ monster, a spinous suspension-feeding lobopodian from the Cambrian Burgess Shale of British Columbia. *Palaeontology* 2020;**63**:979–94.

Caron J-B, Smith MR, Harvey THP. Beyond the Burgess Shale: Cambrian microfossils track the rise and fall of hallucigeniid lobopodians. *Proceedings of the Royal Society B: Biological Sciences* 2013;**280**:20131613.

Chen J-Y, Edgecombe G, Ramsköld L *et al.* Head segmentation in Early Cambrian *Fuxianhuia*: implications for arthropod evolution. *Science (1979)* 1995;**268**:1339–43.

Chen J-Y, Waloszek D, Maas A. A new ‘great-appendage’ arthropod from the Lower Cambrian of China and homology of chelicerate chelicerae and raptorial antero-ventral appendages. *Lethaia* 2004;**37**:3–20.

Chen J-Y, Zhou G, Ramsköld L. The Cambrian lobopodian Microdictyon sinicum. *Bulletin of National Museum of Natural Science* 1995;**5**:1–93.

Cong P, Ma X, Hou X *et al.* Brain structure resolves the segmental affinity of anomalocaridid appendages. *Nature* 2014;**513**:538–42.

Conway Morris S. A new metazoan from the Cambrian Burgess Shale of British Columbia. *Palaeontology* 1977;**20**:623–40.

Conway Morris S, Robison RA. More soft-bodied animals and algae from the Middle Cambrian of Utah and British Columbia. *The University of Kansas Paleontological Contributions* 1988;**122**:1–48.

Daley AC, Bergström J. The oral cone of *Anomalocaris* is not a classic “peytoia.” *Naturwissenschaften* 2012;**99**:501–4.

Daley AC, Budd GE. New anomalocaridid appendages from the Burgess Shale, Canada. *Palaeontology* 2010;**53**:721–38.

Daley AC, Budd GE, Caron J-B *et al.* The Burgess Shale anomalocaridid *Hurdia* and its significance for early euarthropod evolution. *Science (1979)* 2009;**323**:1597–600.

Daley AC, Edgecombe GD. Morphology of *Anomalocaris canadensis* from the Burgess Shale. *J Paleontol* 2014;**88**:68–91.

Dastych H, McInnes SJ, Claxton SK. Oreella mollis Murray, 1910 (Tardigrada): a redescription and revision of Oreella. *Mitteilungen aus dem Hamburgischen Zoologischen Museum und Institut* 1998;**95**:89–113.

Degma P, Guidetti R. Tardigrade taxa. In: Schill RO (ed.), *Water Bears: The Biology of Tardigrades*. Cham, Switzerland: Springer Nature Switzerland, 2018, 371–409.

Dzik J. The xenusian-to-anomalocaridid transition within the lobopodians. *Bollettino della Società Paleontologica Italiana* 2011;**50**:65–74.

Dzik J, Krumbiegel G. The oldest “onychophoran” *Xenusion*: a link connecting phyla? *Lethaia* 1989;**22**:169–81.

Edgecombe G, Ramsköld L. Relationships of Cambrian Arachnata and the systematic position of Trilobita. *J Paleontol* 1999;**73**:263–87.

Edgecombe GD. Palaeontological and molecular evidence linking arthropods, onychophorans, and other Ecdysozoa. *Evolution: Education and Outreach* 2009;**2**:178–90.

Eriksson BJ, Budd GE. Onychophoran cephalic nerves and their bearing on our understanding of head segmentation and stem-group evolution of Arthropoda. *Arthropod Struct Dev* 2000;**29**:197–209.

Eriksson BJ, Tait NN, Budd GE *et al.* The involvement of [i]engrailed[/i] and [i]wingless[/i] during segmentation in the onychophoran [i]Euperipatoides kanangrensis[/i] (Peripatopsidae: Onychophora) (Reid 1996). *Dev Genes Evol* 2009;**219**:249–64.

Fontoura P, Bartels PJ, Jørgensen A *et al.* A dichotomous key to the genera of the Marine Heterotardigrades (Tardigrada). *Zootaxa* 2017;**4294**:1–45.

Fritsch M, Richter S. The formation of the nervous system during larval development in Triops cancriformis (Bosc) (crustacea, Branchiopoda): An immunohistochemical survey. *J Morphol* 2010;**271**:1457–81.

Fujimoto S. A new Stygarctus (Arthrotardigrada: Stygarctidae) from Japan, with entangled seminal receptacle ducts. *Zootaxa* 2014;**3784**:187–95.

Fujimoto S, Suzuki AC, Ito M *et al.* Marine tardigrades from Lützow-Holm Bay, East Antarctica with the description of a new species. *Polar Biol* 2020;**43**:679–93.

Gabriel WN, Goldstein B. Segmental expression of Pax3/7 and Engrailed homologs in tardigrade development. *Dev Genes Evol* 2007;**217**:421–33.

Game M, Smith FW. Loss of intermediate regions of perpendicular body axes contributed to miniaturization of tardigrades. *Proceedings of the Royal Society B: Biological Sciences* 2020;**287**, DOI: 10.1098/rspb.2020.1135rspb20201135.

García-Bellido DC, Edgecombe GD, Paterson JR *et al.* A ‘Collins’ monster’-type lobopodian from the Emu Bay Shale Konservat-Lagerstätte (Cambrian), South Australia. *Alcheringa* 2013;**37**:474–8.

Gąsiorek P, Kristensen DM, Kristensen RM. Extreme secondary sexual dimorphism in the genus Florarctus (Heterotardigrada: Halechiniscidae). *Marine Biodiversity* 2021;**51**, DOI: 10.1007/s12526-021-01183-y.

Gąsiorek P, Stec D, Morek W *et al.* An integrative redescription of Echiniscus testudo (Doyère, 1840), the nominal taxon for the class Heterotardigrada (Ecdysozoa: Panarthropoda: Tardigrada). *Zool Anz* 2017a;**270**:107–22.

Gąsiorek P, Stec D, Morek W *et al.* Deceptive conservatism of claws: distinct phyletic lineages concealed within Isohypsibioidea (Eutardigrada) revealed by molecular and morphological evidence. *Contributions to Zoology* 2019;**88**:78–132.

Gąsiorek P, Zawierucha K, Stec D *et al.* Integrative redescription of a common Arctic water bear Pilatobius recamieri (Richters, 1911). *Polar Biol* 2017b;**40**:2239–52.

Grollmann MM, Jørgensen A, Møbjerg N. Actinarctus doryphorus (Tanarctidae) DNA barcodes and phylogenetic reinvestigation of Arthrotardigrada with new A. doryphorus and Echiniscoididae sequences. *Zootaxa* 2023;**5284**:351–63.

Gross V, Epple L, Mayer G. Organization of the central nervous system and innervation of cephalic sensory structures in the water bear Echiniscus testudo (Tardigrada: Heterotardigrada) revisited. *J Morphol* 2021;**282**:1298–312.

Gross V, Mayer G. Neural development in the tardigrade Hypsibius dujardini based on anti-acetylated α-tubulin immunolabeling. *Evodevo* 2015;**6**, DOI: 10.1186/s13227-015-0008-4.

Halberg KA, Persson D, Møbjerg N *et al.* Myoanatomy of the marine tardigrade [i]Halobiotus crispae[/i] (Eutardigrada: Hypsibiidae). *J Morphol* 2009;**270**:996–1013.

Han J, Liu J, Zhang Z *et al.* Trunk ornament on the palaeoscolecid worms Cricocosmia and Tabelliscolex from the Early Cambrian Chengjiang deposits of China. *Acta Palaeontol Pol* 2007;**52**:423–31.

Hansen JG, Kristensen RM, Jørgensen A *et al.* *The Armoured Marine Tardigrades (Arthrotardigrada, Tardigrada)*., 2012.

Harzsch S, Waloszek D. Serotonin-immunoreactive neurons in the ventral nerve cord of Crustacea: A character to study aspects of arthropod phylogeny. *Arthropod Struct Dev* 2000;**29**:307–22.

Harzsch S, Wildt M, Battelle B *et al.* Immunohistochemical localization of neurotransmitters in the nervous system of larval *Limulus polyphemus* (Chelicerata, Xiphosura): evidence for a conserved protocerebral architecture in Euarthropoda. *Arthropod Struct Dev* 2005;**34**:327–42.

Haug JT, Briggs DE, Haug C. Morphology and function in the Cambrian Burgess Shale megacheiran arthropod [i]Leanchoilia superlata[/i] and the application of a descriptive matrix. *BMC Evol Biol* 2012;**12**:162.

Haug JT, Waloszek D, Maas A *et al.* Functional morphology, ontogeny and evolution of mantis shrimp-like predators in the Cambrian. *Palaeontology* 2012;**55**:369–99.

Hou X-G, Bergström J. Cambrian lobopodians–ancestors of extant onychophorans? *Zool J Linn Soc* 1995;**114**:3–19.

Hou XG, Ma XY, Zhao J *et al.* The lobopodian Paucipodia inermis from the Lower Cambrian Chengjiang fauna, Yunnan, China. *Lethaia* 2004;**37**:235–44.

Jørgensen A, Møbjerg N, Kristensen RM. Phylogeny and evolution of the Echiniscidae (Echiniscoidea, Tardigrada) - an investigation of the congruence between molecules and morphology. *Journal of Zoological Systematics and Evolutionary Research* 2011;**49**:6–16.

Kayastha P, Roszkowska M, Mioduchowska M *et al.* Integrative descriptions of two new tardigrade species along with the new record of Mesobiotus skorackii Kaczmarek et al., 2018 from Canada. *Diversity (Basel)* 2021;**13**, DOI: 10.3390/d13080394.

Kihm J-H, Smith FW, Kim S *et al.* Cambrian lobopodians shed light on the origin of the tardigrade body plan. *Proceedings of the National Academy of Sciences* 2023a;**120**:2017.

Kihm JH, Zawierucha K, Rho HS *et al.* Homology of the head sensory structures between Heterotardigrada and Eutardigrada supported in a new species of water bear (Ramazzottiidae: Ramazzottius). *Zoological Lett* 2023b;**9**:1–17.

Kristensen RM. New aberrant eutardigrades from homothermic springs on Disko Island, West Greenland. In: Nelson DR (ed.), *Proceedings of the Third International Symposium on Tardigrada*. Johnson City, Tennessee: East Tennessee State University Press, 1982, 203–20.

Kristensen RM, Sørensen MV, Hansen JG *et al.* A new species of Neostygarctus (Arthrotardigrada) from the Condor Seamount in the Azores, Northeast Atlantic. *Marine Biodiversity* 2015;**45**:453–67.

Kühl G, Briggs DEG, Rust J. A great-appendage arthropod with a radial mouth from the Lower Devonian Hunsrück Slate, Germany. *Science (1979)* 2009;**323**:771–3.

Legg DA, Sutton MD, Edgecombe GD. Arthropod fossil data increase congruence of morphological and molecular phylogenies. *Nat Commun* 2013;**4**:2485.

Liu J, Dunlop JA. Cambrian lobopodians: A review of recent progress in our understanding of their morphology and evolution. *Palaeogeogr Palaeoclimatol Palaeoecol* 2014;**398**:4–15.

Liu J, Shu D, Han J *et al.* A large xenusiid lobopod with complex appendages from the Lower Cambrian Chengjiang Lagerstätte. 2006;**51**:215–22.

Liu J, Shu D, Han J *et al.* Morpho-anatomy of the lobopod [i]Magadictyon[/i] [sic] cf. [i]haikouensis[/i] from the Early Cambrian Chengjiang Lagerstätte, South China. *Acta Zoologica* 2007;**88**:279–88.

Liu J, Shu D, Han J *et al.* The lobopod *Onychodictyon* from the lower Cambrian Chengjiang lagerstätte revisited. *Acta Palaeontol Pol* 2008;**53**:285–92.

Liu J, Steiner M, Dunlop JA *et al.* An armoured Cambrian lobopodian from China with arthropod-like appendages. *Nature* 2011;**470**:526–30.

Liu Y, Maas A, Waloszek D. Early development of the anterior body region of the grey widow spider [i]Latrodectus geometricus[/i] Koch, 1841 (Theridiidae, Araneae). *Arthropod Struct Dev* 2009;**38**:401–16.

Liu Y, Maas A, Waloszek D. Early embryonic development of the head region of *Gryllus assimilis* Fabricius, 1775 (Orthoptera, Insecta). *Arthropod Struct Dev* 2010;**39**:382–95.

Ma X, Cong P, Hou X *et al.* An exceptionally preserved arthropod cardiovascular system from the early Cambrian. *Nat Commun* 2014a;**5**:3560.

Ma X, Edgecombe GD, Legg DA *et al.* The morphology and phylogenetic position of the Cambrian lobopodian *Diania cactiformis*. *J Syst Palaeontol* 2014b;**12**:no-no.

Ma X, Hou X, Aldridge RJ *et al.* Morphology of Cambrian lobopodian eyes from the Chengjiang Lagerstätte and their evolutionary significance. *Arthropod Struct Dev* 2012;**41**:495–504.

Ma X, Hou X, Bergström J. Morphology of *Luolishania longicruris* (Lower Cambrian, Chengjiang Lagerstätte, SW China) and the phylogenetic relationships within lobopodians. *Arthropod Struct Dev* 2009;**38**:271–91.

Maas A, Mayer G, Kristensen RM *et al.* A Cambrian micro-lobopodian and the evolution of arthropod locomotion and reproduction. *Chinese Science Bulletin* 2007;**52**:3385–92.

Mapalo MA, Game M, Smith FW *et al.* Expression of distal limb patterning genes in Hypsibius exemplaris indicate regionalization and suggest distal identity of tardigrade legs. *Evodevo* 2024;**15**:1–15.

Mapalo MA, Wolfe JM, Ortega-Hernández J. Cretaceous amber inclusions illuminate the evolutionary origin of tardigrades. *Commun Biol* 2024;**7**:1–13.

Marchioro T, Rebecchi L, Cesari M *et al.* Somatic musculature of Tardigrada: phylogenetic signal and metameric patterns. *Zool J Linn Soc* 2013;**169**:580–603.

Marcus E. Batillipes pennaki, a new marine tardigrade from the North and South American Atlantic coast. *Comunicaciones Zoologicas del Museo de Historia Natural de Montevideo* 1946;**33**.

Marley NJ, Mcinnes SJ, Sands CJ. Phylum Tardigrada: A re-evaluation of the Parachela. *Zootaxa* 2011;**64**:51–64.

Martin C, Mayer G. Neuronal tracing of oral nerves in a velvet worm - Implications for the evolution of theecdysozoan brain. *Front Neuroanat* 2014;**8**:1–13.

Mayer G, Harzsch S. Immunolocalization of serotonin in Onychophora argues against segmental ganglia being an ancestral feature of arthropods. *BMC Evol Biol* 2007;**7**:1–9.

Mayer G, Kauschke S, Rüdiger J *et al.* Neural markers reveal a one-segmented head in tardigrades (water bears). *PLoS One* 2013a;**8**:e59090.

Mayer G, Martin C, Rüdiger J *et al.* Selective neuronal staining in tardigrades and onychophorans provides insights into the evolution of segmental ganglia in panarthropods. *BMC Evol Biol* 2013b;**13**, DOI: 10.1186/1471-2148-13-230.

Michalczyk Ł, Wełnicz W, Frohme M *et al.* Redescriptions of three Milnesium Doyère, 1840 taxa (Tardigrada: Eutardigrada: Milnesiidae), including the nominal species for the genus. *Zootaxa* 2012;**20**:1–20.

Mittmann B, Scholtz G. Development of the nervous system in the “head” of [i]Limulus polyphemus[/i] (Chelicerata: Xiphosura): morphological evidence for a correspondence between the segments of the chelicerae and of the (first) antennae of Mandibulata. *Dev Genes Evol* 2003;**213**:9–17.

Møbjerg N, Jørgensen A, Kristensen RM *et al.* Morphology and functional anatomy. In: Schill RO (ed.), *Water Bears: The Biology of Tardigrades*. Cham, Switzerland: Springer Nature Switzerland, 2018, 57–94.

Møbjerg N, Kristensen RM, Jørgensen A. Data from new taxa infer Isoechiniscoides gen. nov. and increase the phylogenetic and evolutionary understanding of echiniscoidid tardigrades (Echiniscoidea: Tardigrada). *Zool J Linn Soc* 2016;**178**:804–18.

Murdock DJE, Gabbott SE, Mayer G *et al.* Decay of velvet worms (Onychophora), and bias in the fossil record of lobopodians. *BMC Evol Biol* 2014;**14**, DOI: 10.1186/s12862-014-0222-z.

Nelson DR. Current status of the Tardigrada: evolution and ecology. *Integr Comp Biol* 2002;**42**:652–9.

Ortega-Hernández J. Lobopodians. *Current Biology* 2015;**25**:R873–5.

Ortega-Hernández J. Making sense of “lower” and “upper” stem-group Euarthropoda, with comments on the strict use of the name Arthropoda von Siebold, 1848. *Biological Reviews* 2016;**91**:255–73.

Ortega-Hernández J, Brena C. Ancestral patterning of tergite formation in a centipede suggests derived mode of trunk segmentation in trilobites. *PLoS One* 2012;**7**:e52623.

Ortega-Hernández J, Janssen R, Budd GE. Origin and evolution of the panarthropod head – A palaeobiological and developmental perspective. *Arthropod Struct Dev* 2017;**46**:354–79.

Ortega-Hernández J, Legg D, Braddy S. The phylogeny of aglaspidid arthropods and the internal relationships within Artiopoda. *Cladistics* 2013;**29**:15–45.

Ou Q, Liu J, Shu D *et al.* A rare onychophoran-like lobopodian from the lower Cambrian Chengjiang Lagerstätte, southwestern China, and its phylogenetic implications. *J Paleontol* 2011;**85**:587–94.

Ou Q, Shu D, Mayer G. Cambrian lobopodians and extant onychophorans provide new insights into early cephalization in Panarthropoda. *Nat Commun* 2012;**3**:1261.

Park TYS, Kihm JH, Woo J *et al.* Brain and eyes of Kerygmachela reveal protocerebral ancestry of the panarthropod head. *Nat Commun* 2018;**9**:1–7.

Pechmann M, Schwager EE, Turetzek N *et al.* Regressive evolution of the arthropod tritocerebral segment linked to functional divergence of the Hox gene *labial*. *Proceedings of the Royal Society B: Biological Sciences* 2015;**282**:20151162.

Persson DK, Halberg K a, Jørgensen A *et al.* Neuroanatomy of [i]Halobiotus crispae[/i] (Eutardigrada: Hypsibiidae): Tardigrade brain structure supports the clade Panarthropoda. *J Morphol* 2012;**273**:1227–45.

Persson DK, Halberg KA, Jørgensen A *et al.* Brain anatomy of the marine tardigrade [i]Actinarctus doryphorus[/i] (Arthrotardigrada). *J Morphol* 2014;**275**:173–90.

Petersen B. The tardigrade fauna of Greenland. *Meddelelser om Grønland* 1951;**150**:1–94.

Poinar G. Fossil onychophorans from Dominican and Baltic amber: Tertiapatus dominicanus n.g., n.sp. (Tertiapatidae n.fam.) and Succinipatopsis balticus n.g., n.sp. (Succinipatopsidae n.fam.) with a proposed classification of the subphylum Onychophora. *Invertebrate Biology* 2000;**119**:104–9.

Pollock LW. Observations on marine Heterotardigrada, including a new genus from the Western Atlantic Ocean. *Cah Biol Mar* 1975;**17**:121–32.

Posnien N, Bashasab F, Bucher G. The insect upper lip (labrum) is a nonsegmental appendage-like structure. *Evol Dev* 2009;**11**:480–8.

Raeker J, Lord A, Herranz M *et al.* The big, the small and the weird: A phylogenomic analysis of extant Priapulida. *Mol Phylogenet Evol* 2025;**204**, DOI: 10.1016/j.ympev.2025.108297.

Ramazzotti G, Maucci W. Il Phylum Tardigrada. *Memorie dell’Instituto Italiano di Idrobiologia* 1983;**41**:1–1012.

Ramsköld L. The second leg row of *Hallucigenia* discovered. *Lethaia* 1992;**25**:221–4.

Ramsköld L, Chen J-Y. Cambrian lobopodians: morphology and phylogeny. In: Edgecombe GD (ed.), *Arthropod Fossils and Phylogeny*. New York: Columbia University Press, 1998, 107–50.

Richter S, Loesel R, Purschke G *et al.* Invertebrate neurophylogeny: Suggested terms and definitions for a neuroanatomical glossary. *Front Zool* 2010;**7**:1–49.

Rothe BH, Schmidt-Rhaesa A. Structure of the nervous system in [i]Tubiluchus troglodytes[/i] (Priapulida). *Invertebrate Biology* 2010;**129**:39–58.

Van Roy P, Daley AC, Briggs DEG. Anomalocaridids had two sets of lateral flaps. *57th Palaeontological Association Annual Meeting*. 2013, 58.

Van Roy P, Daley AC, Briggs DEG. Anomalocaridid trunk limb homology revealed by a giant filter-feeder with paired flaps. *Nature* 2015;**522**:77–80.

Saulenko AA, Maiorova AS, Martínez Arbizu P *et al.* Deep-sea tardigrades from the North-Western Pacific, with descriptions of two new species. *Diversity (Basel)* 2022;**14**, DOI: 10.1080/03745485809494479.

Scholtz G, Edgecombe GD. The evolution of arthropod heads: reconciling morphological, developmental and palaeontological evidence. *Dev Genes Evol* 2006;**216**:395–415.

Schulz VE. Actinarctus doryphorus, nov. gen. nov. spec. ein merkwürdiger Tardigrad aus der Nordsee. *Zool Anz* 1935;**111**:285–8.

Schulze C, Neves RC, Schmidt-Rhaesa A. Comparative immunohistochemical investigation on the nervous system of two species of Arthrotardigrada (Heterotardigrada, Tardigrada). *Zool Anz* 2014;**253**:225–35.

Schulze C, Schmidt-Rhaesa A. The architecture of the nervous system of Echiniscus testudo (Echiniscoidea, Heterotardigrada). *J Limnol* 2013;**72**:44–53.

de Sena Oliveira I, Mayer G. Apodemes associated with limbs support serial homology of claws and jaws in Onychophora (velvet worms). *J Morphol* 2013, DOI: 10.1002/jmor.20171.

Smith FW, Boothby TC, Giovannini I *et al.* The compact body plan of tardigrades evolved by the loss of a large body region. *Current Biology* 2016;**26**:224–9.

Smith MR, Caron JB. Hallucigenia’s head and the pharyngeal armature of early ecdysozoans. *Nature* 2015;**523**:75–8.

Smith MR, Harvey THP, Butterfield NJ. The macro- And microfossil record of the Cambrian priapulid Ottoia. *Palaeontology* 2015;**58**:705–21.

Smith MR, Ortega-Hernández J. Hallucigenia’s onychophoran-like claws and the case for Tactopoda. *Nature* 2014;**514**:363–6.

Steiner M, Hu S-X, Liu J *et al.* A new species of *Hallucigenia* from the Cambrian Stage 4 Wulongqing Formation of Yunnan (South China) and the structure of sclerites in lobopodians. *Bull Geosci* 2012;**87**:107–24.

Storch V. Priapulida. In: Harrison FW, Rupert EE (eds.), *Microscopic Anatomy of Invertebrates Volume 4*. New York: Wiley-Liss, Inc., 1991, 333–50.

Tanaka G, Hou X, Ma X *et al.* Chelicerate neural ground pattern in a Cambrian great appendage arthropod. *Nature* 2013;**502**:364–7.

Thompson I, Jones DS. A possible onychophoran from the Middle Pennsylvanian Mazon Creek beds of Northern Illinois. *J Paleontol* 1980;**54**:588–96.

Todaro MA, Shirley TC. A new meiobenthic priapulid (priapulida, tubiluchidae) from a mediterranean submarine cave. *Italian Journal of Zoology* 2003;**70**:79–87.

Topper TP, Skovsted CB, Peel JS *et al.* Moulting in the lobopodian *Onychodictyon* from the lower Cambrian of Greenland. *Lethaia* 2013;**46**:490–5.

Vannier J, Liu J, Lerosey-Aubril R *et al.* Sophisticated digestive systems in early arthropods. *Nat Commun* 2014;**5**:3641.

Waloszek D, Chen J-Y, Maas A *et al.* Early Cambrian arthropods—new insights into arthropod head and structural evolution. *Arthropod Struct Dev* 2005;**34**:189–205.

Wang D, Vannier J, Martín-Durán JM *et al.* Preservation and early evolution of scalidophoran ventral nerve cord. *Sci Adv* 2025;**11**:eadr0896.

Whittington HB. The lobopod animal *Aysheaia pedunculata* Walcott, Middle Cambrian, Burgess Shale, British Columbia. *Philosophical Transactions of the Royal Society of London B: Biological Sciences* 1978;**284**:165–97.

Whittington HB. Anatomy of the Ordovician trilobite [i]Placoparia[/i]. *Philosophical Transactions of the Royal Society B: Biological Sciences* 1993;**339**:109–18.

Whittington HB, Briggs DEG. The largest Cambrian animal, Anomalocaris, Burgess Shale, British Columbia. *Philosophical Transactions of the Royal Society B: Biological Sciences* 1985;**309**:569–609.

Yamakawa S, Hejnol A. Ecdysteroid-dependent molting in tardigrades. *Current Biology* 2024;**34**:5804-5812.e4.

Yang J, Ortega-Hernández J, Butterfield NJ *et al.* Specialized appendages in fuxianhuiids and the head organization of early euarthropods. *Nature* 2013;**494**:468–71.

Yang J, Ortega-Hernández J, Butterfield NJ *et al.* Fuxianhuiid ventral nerve cord and early nervous system evolution in Panarthropoda. *Proc Natl Acad Sci U S A* 2016;**113**:2988–93.

Yang J, Ortega-Hernández J, Gerber S *et al.* A superarmored lobopodian from the Cambrian of China and early disparity in the evolution of Onychophora. *Proc Natl Acad Sci U S A* 2015;**112**:8678–83.

Zhang X, Briggs DEG. The nature and significance of the appendages of *Opabinia* from the Middle Cambrian Burgess Shale. *Lethaia* 2007;**40**:161–73.

Zhang X-G, Aldridge RJ. Development and diversification of trunk plates of the lower Cambrian lobopodians. *Palaeontology* 2007;**50**:401–15.

De Zio Grimaldi S, Gallo MD abbabbo, Lucia MRM. Neoarctus primigenius n. G., n. sp., a new Stygarctidae of the Tyrrhenian sea (Tardigrada, Arthrotardigrada). *Italian Journal of Zoology* 1992;**59**:309–13.
